# Supplementary material for: Convalescent COVID-19 patients are susceptible to endothelial dysfunction due to persistent immune activation
Source: eLife. 2021 Mar 23;10:e64909. doi: 10.7554/eLife.64909 (PMC7987341; doi:10.7554/eLife.64909)
Supplement: Figure 3—source data 1. — Concentrations of cytokines (pg/ml) and CEC attributes in terms of mean numbers of CECs, SELP+ CECs or CX3CL1+ CECs per million PBMCs were used to calculate Spearman rank correlation coefficients shown in Figure 3. [file elife-64909-fig3-data1.xlsx]

## Sheet: 1; MIP-1alpha
		Day (post-hospital discharge)	Patient_id	MIP-1 alpha (pg/ml)	No. of CECs/ million PBMCs		Title	Significantly correlated cytokines with CEC attributes in COVID-19 convalescent patients.
							Description	Spearman rank correlation coefficients were calculated to assess associations between the concentrations of cytokines (pg/ml) and CEC attributes in terms of mean numbers of CECs, SELP+ CECs or CX3CL1+ CECs per million PBMCs. Spearman’s correlation coefficient r and p values (two-tailed test) were shown in plots of main Figure 3.
Cardio risk		21	C-T039	0.18	506.542
		14	C-T087	0.18	57.2241
		19	C-T095	0.18	48.3726
		86	C-T062	0.18	30.5582
		14	C-T297	0.18	89.5259
		23	C-T018	1.33088	141.561
		23	C-T041	2.37188	118.995
		28+	C-N021	152.09	93.5369
		46	C-T106	0.18	50.0386
		105	C-T073	3.47	743.644
		33	C-T032	15.54	145.223
		15	C-T100	0.18	46.7542
		28	C-C021	0.82	78.6932
		29	C-T174	0.18	49.9288
		28	C-T186	0.18	105.647

## Sheet: 2; IL-17A
		Day (post-hospital discharge)	Patient_id	IL-17A (pg/ml)	SELP+CEC/ million cells		Title	Significantly correlated cytokines with CEC attributes in COVID-19 convalescent patients.
							Description	Spearman rank correlation coefficients were calculated to assess associations between the concentrations of cytokines (pg/ml) and CEC attributes in terms of mean numbers of CECs, SELP+ CECs or CX3CL1+ CECs per million PBMCs. Spearman’s correlation coefficient r and p values (two-tailed test) were shown in plots of main Figure 3.
Cardio risk		21	C-T039	0.0880521	0
		14	C-T087	1.57	24.1
		19	C-T095	9.76	7.69
		86	C-T062	1.43	0
		14	C-T297	4.15	12.2
		23	C-T018	0.0880521	0
		23	C-T041	0.0880521	0
		28+	C-N021	74.8	22.1
		46	C-T106	1.79	0
		105	C-T073	0.84	0
		33	C-T032	16.98	24
		15	C-T100	16.56	0
		28	C-C021	0.99	14.3
		29	C-T174	0.0880521	0
		28	C-T186	4.94	0

## Sheet: 3; IL-8
		Day (post-hospital discharge)	Patient_id	IL-8 (pg/ml)	CX3CL1+CECs/ million PBMCs		Title	Significantly correlated cytokines with CEC attributes in COVID-19 convalescent patients.
							Description	Spearman rank correlation coefficients were calculated to assess associations between the concentrations of cytokines (pg/ml) and CEC attributes in terms of mean numbers of CECs, SELP+ CECs or CX3CL1+ CECs per million PBMCs. Spearman’s correlation coefficient r and p values (two-tailed test) were shown in plots of main Figure 3.
Cardio risk		21	C-T039	0.0577099	0.9
		14	C-T087	0.0577099	5
		19	C-T095	0.0577099	0
		86	C-T062	0.0577099	0
		14	C-T297	0.0577099	5.13
		23	C-T018	0.0577099	0
		23	C-T041	0.0577099
		28+	C-N021	0.302012	1.75
		46	C-T106	0.0577099	2.56
		105	C-T073	0.0577099	0.36
		33	C-T032	1.04134	2.44
		15	C-T100	0.0577099	0
		28	C-C021	1.27	7.14
		29	C-T174	5.35835	7.69
		28	C-T186	0.0577099	0

## Sheet: 4; IL-18
		Day (post-hospital discharge)	Patient_id	IL-18 (pg/ml)	CX3CL1+CECs/ million PBMCs		Title	Significantly correlated cytokines with CEC attributes in COVID-19 convalescent patients.
							Description	Spearman rank correlation coefficients were calculated to assess associations between the concentrations of cytokines (pg/ml) and CEC attributes in terms of mean numbers of CECs, SELP+ CECs or CX3CL1+ CECs per million PBMCs. Spearman’s correlation coefficient r and p values (two-tailed test) were shown in plots of main Figure 3.
Cardio risk		21	C-T039	32.7812	0.9
		14	C-T087	11.152	5
		19	C-T095	21.6373	0
		86	C-T062	9.33979	0
		14	C-T297	92.7002	5.13
		23	C-T018	22.7523	0
		23	C-T041	16.5
		28+	C-N021	42.7357	1.75
		46	C-T106	30.6865	2.56
		105	C-T073	3.1266	0.36
		33	C-T032	19.1774	2.44
		15	C-T100	8.81775	0
		28	C-C021	82.8626	7.14
		29	C-T174	84.1795	7.69
		28	C-T186	37.0403	0

## Sheet: 5; EGF
		Day (post-hospital discharge)	Patient_id	EGF (pg/ml)	No. of CECs/ million PBMCs		Title	Significantly correlated cytokines with CEC attributes in COVID-19 convalescent patients.
							Description	Spearman rank correlation coefficients were calculated to assess associations between the concentrations of cytokines (pg/ml) and CEC attributes in terms of mean numbers of CECs, SELP+ CECs or CX3CL1+ CECs per million PBMCs. Spearman’s correlation coefficient r and p values (two-tailed test) were shown in plots of main Figure 3.
No cardio risk		6	C-T050	8.8	113.986
		30	C-T038	0.34	60.6287
		8	C-T093	0.34	45.0272
		31	C-T052	0.34	34.8582
		88	C-T035	0.34	65.5622
		14	C-T043	2.03643	479.563
		1	C-T066	15.4673	71.66
		24	C-T031	0.34	108.686
		29	C-T027	5.38515	68.3093
		31	C-T051	13.92	194.946
		21	C-T015	4.39	138.198
		14	C-T057	5.78123	108.142
		17	C-T092	0.34	66.8777
		132	C-T055	0.34	56.3614
		15	C-T182	18.8111	130.389

## Sheet: 6; LIF
		Day (post-hospital discharge)	LIF (pg/ml)	No. of CECs/ million PBMCs		Title	Significantly correlated cytokines with CEC attributes in COVID-19 convalescent patients.
						Description	Spearman rank correlation coefficients were calculated to assess associations between the concentrations of cytokines (pg/ml) and CEC attributes in terms of mean numbers of CECs, SELP+ CECs or CX3CL1+ CECs per million PBMCs. Spearman’s correlation coefficient r and p values (two-tailed test) were shown in plots of main Figure 3.
No cardio risk		6	7.5	113.986
		30	7.04909	60.6287
		8	2.4349	45.0272
		31	3.71423	34.8582
		88	3.87076	65.5622
		14	6.97369	479.563
		1	8.46935	71.66
		24	4.18511	108.686
		29	5.33293	68.3093
		31	97.2198	194.946
		21	7.33	138.198
		14	5.2548	108.142
		17	3.75049	66.8777
		132	0.0568582	56.3614
		15	6.64116	130.389

## Sheet: 7; PDGF-BB
		Day (post-hospital discharge)	Patient_id	PDGF-BB (pg/ml)	SELP+CEC/ million cells		Title	Significantly correlated cytokines with CEC attributes in COVID-19 convalescent patients.
							Description	Spearman rank correlation coefficients were calculated to assess associations between the concentrations of cytokines (pg/ml) and CEC attributes in terms of mean numbers of CECs, SELP+ CECs or CX3CL1+ CECs per million PBMCs. Spearman’s correlation coefficient r and p values (two-tailed test) were shown in plots of main Figure 3.
No cardio risk		6	C-T050	26.86	0
		30	C-T038	283.687	5.13
		8	C-T093	123.036	0
		31	C-T052	94.4904	0
		88	C-T035	56.5145	0
		14	C-T043	98.5424	0
		1	C-T066	131.84	7.14
		24	C-T031	83.6537	0
		29	C-T027	105.363	0
		31	C-T051	74.265	0
		21	C-T015	79.91	0
		14	C-T057	175.307	34.1
		17	C-T092	139.878	0
		132	C-T055	97.4346	4.35
		15	C-T182	516.513	10.5

## Sheet: 8; PIGF-1
		Day (post-hospital discharge)	Patient_id	PIGF-1 (pg/ml)	CX3CL1+CECs/ million PBMCs		Title	Significantly correlated cytokines with CEC attributes in COVID-19 convalescent patients.
							Description	Spearman rank correlation coefficients were calculated to assess associations between the concentrations of cytokines (pg/ml) and CEC attributes in terms of mean numbers of CECs, SELP+ CECs or CX3CL1+ CECs per million PBMCs. Spearman’s correlation coefficient r and p values (two-tailed test) were shown in plots of main Figure 3.
No cardio risk		6	C-T050	14.31	0
		30	C-T038	2194.86	0
		8	C-T093	0.02	0
		31	C-T052	19182.6	9.09
		88	C-T035	19.379	0
		14	C-T043	21.1273	0
		1	C-T066	46.8902
		24	C-T031	0.02	0
		29	C-T027	32.2789	5.71
		31	C-T051	0.02	0
		21	C-T015	30.82	0
		14	C-T057	60.3054	34.1
		17	C-T092	0.02	0
		132	C-T055	0.02	0
		15	C-T182	17.22	0

## Sheet: 9; IL-1RA
		Day (post-hospital discharge)	Patient_id	IL-1RA (pg/ml)	No. of CECs/ million PBMCs		Title	Significantly correlated cytokines with CEC attributes in COVID-19 convalescent patients.
							Description	Spearman rank correlation coefficients were calculated to assess associations between the concentrations of cytokines (pg/ml) and CEC attributes in terms of mean numbers of CECs, SELP+ CECs or CX3CL1+ CECs per million PBMCs. Spearman’s correlation coefficient r and p values (two-tailed test) were shown in plots of main Figure 3.
No cardio risk		6	C-T050	525	113.986
		30	C-T038	0.230059	60.6287
		8	C-T093	0.230059	45.0272
		31	C-T052	0.230059	34.8582
		88	C-T035	0.230059	65.5622
		14	C-T043	482.733	479.563
		1	C-T066	1517.98	71.66
		24	C-T031	0.230059	108.686
		29	C-T027	0.230059	68.3093
		31	C-T051	0.230059	194.946
		21	C-T015	324.72	138.198
		14	C-T057	526.957	108.142
		17	C-T092	0.230059	66.8777
		132	C-T055	0.230059	56.3614
		15	C-T182	754.279	130.389

## Sheet: 10; IP-10
		Day (post-hospital discharge)	Patient_id	IP-10 (pg/ml)	No. of CECs/ million PBMCs		Title	Significantly correlated cytokines with CEC attributes in COVID-19 convalescent patients.
							Description	Spearman rank correlation coefficients were calculated to assess associations between the concentrations of cytokines (pg/ml) and CEC attributes in terms of mean numbers of CECs, SELP+ CECs or CX3CL1+ CECs per million PBMCs. Spearman’s correlation coefficient r and p values (two-tailed test) were shown in plots of main Figure 3.
No cardio risk		6	C-T050	13.89	113.986
		30	C-T038	10.4552	60.6287
		8	C-T093	8.82898	45.0272
		31	C-T052	5.64419	34.8582
		88	C-T035	9.95013	65.5622
		14	C-T043	13.1563	479.563
		1	C-T066	21.038	71.66
		24	C-T031	7.53852	108.686
		29	C-T027	10.3445	68.3093
		31	C-T051	22.737	194.946
		21	C-T015	13.79	138.198
		14	C-T057	19.6703	108.142
		17	C-T092	6.80009	66.8777
		132	C-T055	9.32025	56.3614
		15	C-T182	24.9557	130.389

[truncated: 6 more sheets: 11; CXCL12, 12; RANTES, 13; IL-5, 14; IL-7, 15; IL-18, 16; IL-4]
